# Supplementary material
Source: PubMed Central journal article supplement (PMC5369647)
Supplement: NIHMS853027-supplement-Figure.pdf [file NIHMS853027-supplement-Figure.pdf]

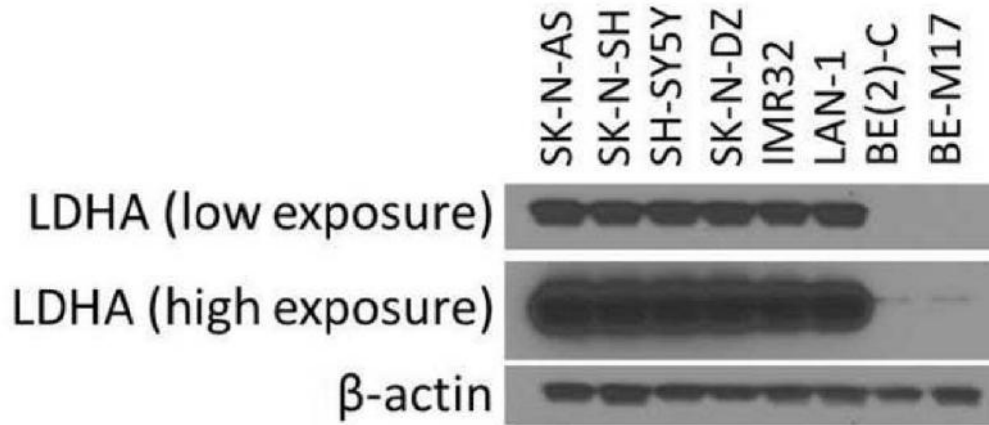

**Supplemental Figure.** Western blotting demonstrating low levels of LDHA in BE(2)-C and BE(2)-M17 cells with prolonged chemiluminescent exposure (3 min).  $\beta$ -actin was used for protein loading control.
